# Supplementary material for: Facile one-step preparation of hierarchical α-Fe2O3nanostructures with enhanced performance in energy and environmentally related applications
Source: Royal Society of Chemistry journal article supplement (doi:10.1039/c4ce01177e), 2014-09-01
Supplement: c4ce01177e1.pdf [file c4ce01177e1.pdf]

Electronic Supplementary Information for

**Facile One-step Preparation of Hierarchical  $\alpha$ -Fe<sub>2</sub>O<sub>3</sub>  
Nanostructures with Enhanced Performance in Energy and  
Environmentally Related Applications**

Shuting Xie<sup>a</sup>, Fei Lu<sup>a</sup>, Nan Sun<sup>a</sup>, Shaojie Liu<sup>c\*</sup>, Han Jia<sup>d\*</sup> and Liqiang Zheng<sup>ab\*</sup>

*<sup>a</sup>Key laboratory of Colloid and Interface Chemistry, Shandong University, Ministry of  
Education, Jinan, 250100, China*

*<sup>b</sup>National Engineer Technology Research Center for Colloidal Materials, Shandong  
University, Jinan, 250100, China*

*<sup>c</sup>College of Petroleum Engineering, China University of Petroleum (Huadong),  
Qingdao, 266580, China*

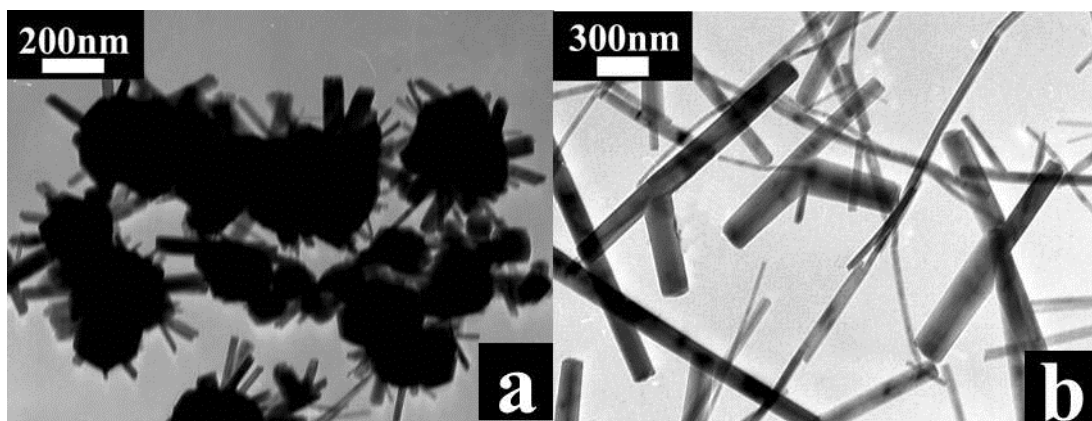

**Fig. S1** TEM images of  $\alpha\text{-Fe}_2\text{O}_3$  nanostructures obtained in (a) the absence of  $\text{C}_{12}\text{mimBr}$ , when the concentration of SDS is 12.5 mM, (b) mixed surfactants.

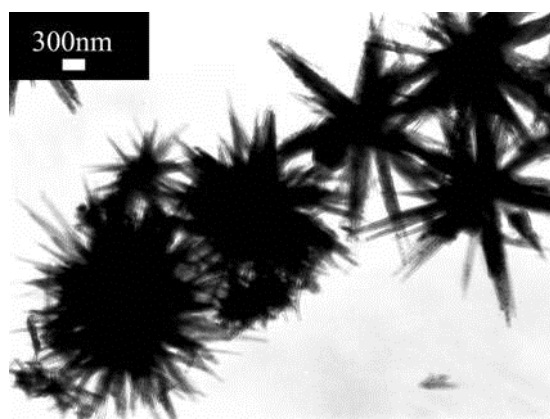

**Fig. S2** TEM images of  $\alpha\text{-Fe}_2\text{O}_3$  nanostructures obtained in mixed SDS/ $\text{C}_{12}\text{mimBr}$  solution when the molar ratio of SDS to  $\text{C}_{12}\text{mimBr}$  is  $r = 0.25$ .
